# Supplementary material for: Recent deterioration of coral reefs in the South China Sea due to multiple disturbances
Source: PeerJ journal article supplement (doi:10.7717/peerj.13634), 2022-07-25
Supplement: raw_data.zip [file raw_data.zip]

## Sheet: BJ
sites	S	N	d	J'	H'(loge)	1-Lambda'
BJ1	75	135	15.09	0.9737	4.204	0.9909
BJ2	66	583	10.21	0.7924	3.3	0.9279
BJ3	67	746	9.978	0.7797	3.279	0.9386
BJ4	66	563	10.26	0.7876	3.3	0.9278
BJ5	42	105	8.81	0.9282	3.469	0.969
BJ6	64	550	9.984	0.7284	3.03	0.8805
BJ7	64	505	10.12	0.8169	3.397	0.9492
BJ8	78	638	11.92	0.7625	3.322	0.922

## Sheet: LH
sites	S	N	d	J'	H'(loge)	1-Lambda'
LH1	73	122	14.9874	0.97493	4.1829	0.991329
LH2	41	215	7.4479	0.787844	2.92571	0.881591
LH3	58	474	9.25143	0.756858	3.07318	0.890081
LH4	6	14	1.89462	0.857661	1.53672	0.791209
LH5	3	3	1.82048	1	1.09861	1
LH6	9	15	2.95415	0.864239	1.89893	0.847619
LH7	42	230	7.53943	0.807625	3.01864	0.92827
LH8	34	165	6.46305	0.811885	2.863	0.903917

## Sheet: PS
sites	S	N	d	J'	H'(loge)	1-Lambda'
PS1	1	3	0		0	0
PS2	1	6	0		0	0
PS3	24	185	4.40583	0.763848	2.42755	0.878143
PS4	30	152	5.77243	0.820338	2.79013	0.912774
PS5	9	67	1.90264	0.66229	1.4552	0.729082
PS6	3	4	1.4427	0.946395	1.03972	0.833333

## Sheet: LYHJ
sites	S	N	d	J'	H'(loge)	1-Lambda'
QF	68	487	10.8269	0.827271	3.49068	0.951268
YY	22	138	4.26201	0.790904	2.44472	0.886703
SY1	71	524	11.1794	0.794754	3.38778	0.934925
JQ	50	247	8.89391	0.831171	3.25156	0.940588
LY1	77	618	11.8261	0.798959	3.47052	0.937336
LY2	39	170	7.39904	0.871638	3.1933	0.948068
LY3	47	290	8.11305	0.787492	3.03196	0.909772
LY4	58	383	9.583	0.777687	3.15776	0.920167
LY5	68	409	11.1412	0.817246	3.44838	0.943933

## Sheet: YX
sites	S	N	d	J'	H'(loge)	1-Lambda'
YX1	68	297	11.7673	0.855296	3.60893	0.958367
YX2	51	169	9.74678	0.862335	3.39055	0.954353
YX3	47	285	8.13801	0.780246	3.00406	0.905461

## Sheet: YZ
sites	S	N	d	J'	H'(loge)	1-Lambda'
YZ1	22	56	5.21694	0.916062	2.83159	0.944805
YZ2	28	252	4.88296	0.631295	2.1036	0.776007
YZ3	54	441	8.70416	0.698962	2.78815	0.873191
YZ4	55	447	8.84875	0.764287	3.06275	0.891674
YZ5	68	574	10.5468	0.78946	3.33113	0.919192
YZ6	21	47	5.19461	0.906764	2.76066	0.93802
YZ7	16	33	4.29	0.950344	2.63491	0.948864
YZ8	35	188	6.49296	0.868972	3.0895	0.940152
